# Supplementary material for: Association between ABO blood group/genotype and COVID-19 in a Japanese population
Source: Research Square preprint supplement (doi:10.21203/rs.3.rs-1838488/v1), 2022-07-19
Supplement: Supplementary file 1 [file 69871c59ca4b1a5eb673e2f8.docx]

| Supplementary Table 1.Association between ABO blood group and incidence of death, IMV usage, and ICU treatment | | | | | | | | |
| --- | --- | --- | --- | --- | --- | --- | --- | --- |
| ABO blood group | Death | |  | IMV usage | |  | ICU treatment | |
| aOR | 95% CI |  | aOR | 95% CI |  | aOR | 95% CI |
| O | 1 | ref. |  | 1 | ref. |  | 1 | ref. |
| A | 0.89 | 0.34–2.35 |  | 1.19 | 0.73–1.93 |  | 1.46 | 0.99–2.16 |
| B | 1.29 | 0.46–3.60 |  | 1.09 | 0.62–1.91 |  | 1.21 | 0.76–1.91 |
| AB | 2.60 | 0.88–7.69 |  | 1.36 | 0.70–2.63 |  | 1.65 | 0.97–2.80 |
| The adjusted odds ratio is estimated by logistic regression after adjustment for age, sex, body mass index, hypertension, diabetes mellitus, cardiovascular disease, malignancy, chronic obstructive pulmonary disease, asthma, chronic liver disease, and chronic kidney disease.  aOR, adjusted odds ratio; 95% CI, 95% confidence interval; ICU, intensive care unit; IMV, invasive mechanical ventilation; ref., reference. | | | | | | | | |

| Supplementary Table 2.Association between ABO genotype and incidence of death, IMV usage, and ICU treatment | | | | | | | | |
| --- | --- | --- | --- | --- | --- | --- | --- | --- |
| ABO genotype | Death | |  | IMV usage | |  | ICU treatment | |
| aOR | 95% CI |  | aOR | 95% CI |  | aOR | 95% CI |
| OO | 1 | ref. |  | 1 | ref. |  | 1 | ref. |
| AA | 1.52 | 0.41–5.67 |  | 0.99 | 0.47–2.08 |  | 1.38 | 0.78–2.44 |
| AO | 0.73 | 0.25–2.13 |  | 1.25 | 0.76–2.08 |  | 1.49 | 0.99–2.24 |
| AB | 2.63 | 0.89–7.79 |  | 1.36 | 0.70–2.62 |  | 1.65 | 0.97–2.79 |
| BB | 2.56 | 0.47–13.8 |  | 2.11 | 0.76–5.82 |  | 1.25 | 0.48–3.28 |
| BO | 1.14 | 0.38–3.38 |  | 0.96 | 0.53–1.75 |  | 1.20 | 0.75–1.93 |
| The adjusted odds ratio is estimated by logistic regression after adjustment for age, sex, body mass index, hypertension, diabetes mellitus, cardiovascular disease, malignancy, chronic obstructive pulmonary disease, asthma, chronic liver disease, and chronic kidney disease.  aOR, adjusted odds ratio; 95% CI, 95% confidence interval; ICU, intensive care unit; IMV, invasive mechanical ventilation; ref., reference. | | | | | | | | |
